# Supplementary material
Source: PubMed Central journal article supplement (PMC5531045)
Supplement: NIHMS880970-supplement-Figures.pdf [file NIHMS880970-supplement-Figures.pdf]

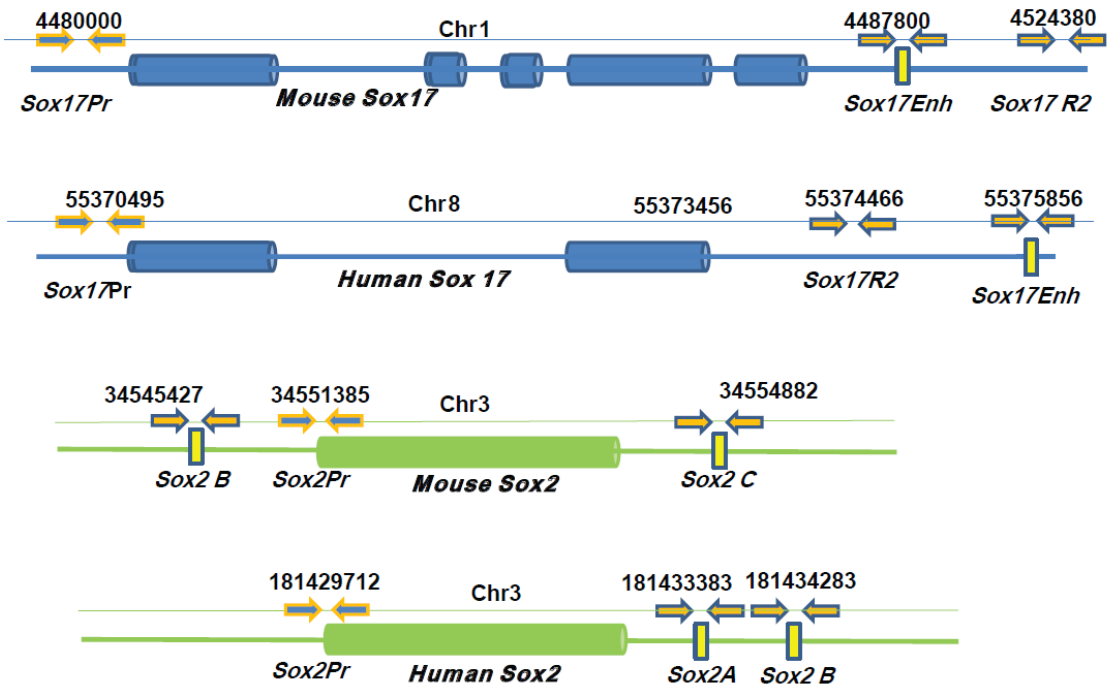

**Supplementary figure 1: ChIP primers map**

The cartoon show the location of primers used in ChIP experiments on mouse and human chromosomes

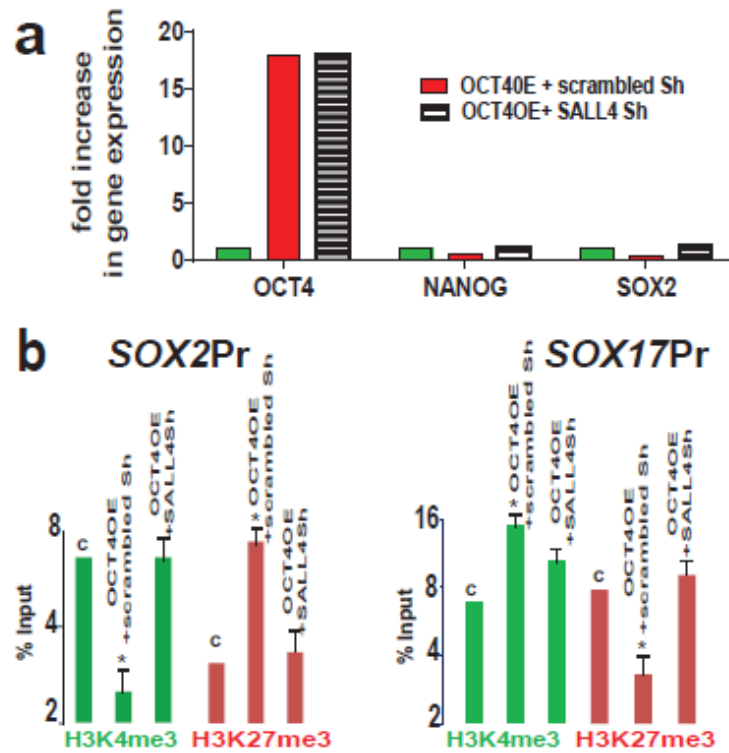

**Supplementary figure 2: SALL4 is not required for *Nanog*, or *Sox2* expression in pluripotent cells but mediates changes in epigenetic marks on *Sox* loci in mesendodermal cells.**

- (a)** Real time PCR of *Oct4*, *Nanog* and *Sox-2* in control, OCT4OE cells (transfected with a scrambled Sh) and SALL4 knock-down cells (SALL4Sh)
- (b)** ChIP anti- H3K4m3 and -H3K27me3 reveals the presence of these marks on *Sox2* and *Sox17* promoters in control (C) or OCT4 overexpressing (OCT4OE) cells in the presence or absence of SALL4 (SALL4Sh). (\* significantly different from control cells, n=3 mean± SEM, T-student test p≤0.01)

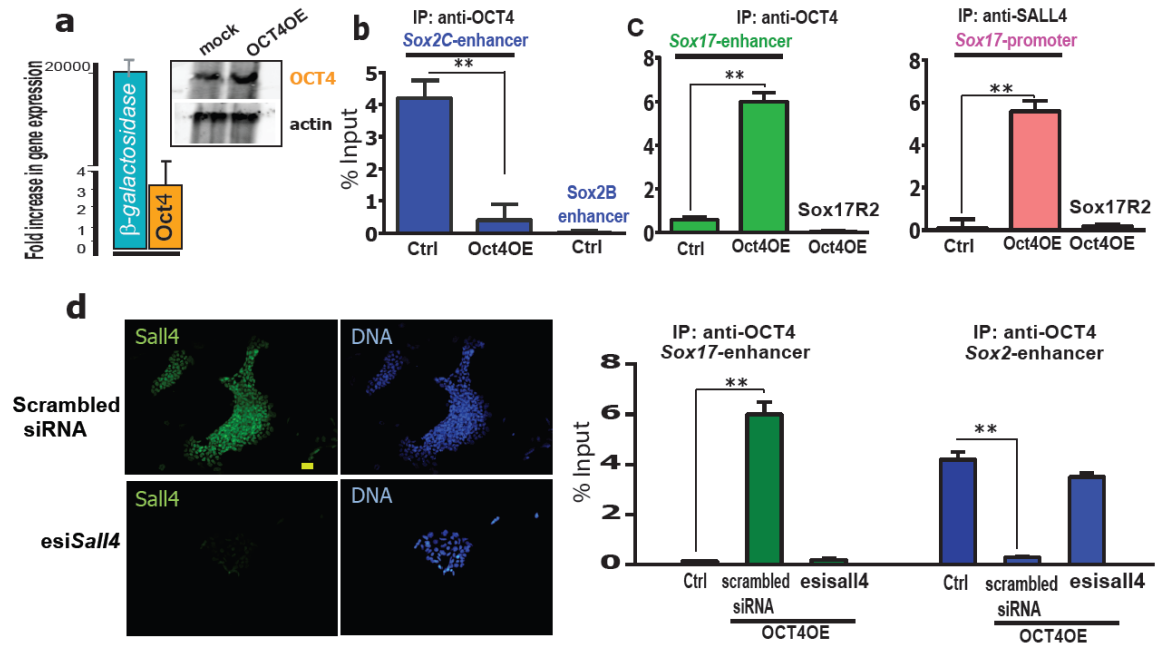

**Supplementary figure 3: OCT4 and SALL4 switch from *Sox2* to *Sox17* regulatory regions in mouse ESC.**

ZhTc6 mouse ES cells were cultured without tetracycline for 48 hrs to induce expression of OCT4 as monitored by PCR of both OCT4 and  $\beta$ -galactosidase and western Blot (inset) (a). 48hrs induction was then used prior to crosslink the cells for ChIP assay. Chromatin was immunoprecipitated with an anti-OCT4 (b) or anti-SALL4 (c) antibody. A real time PCR was then carried out using primers amplifying *Sox2B*, *Sox2C*, *Sox17*enhancers (Enh) or a *Sox17R2* 3' region or promoters (Pr). (d) SALL4 was downregulated in ZhTc6 cells using a siRNA (esiSall4) and cells immunostained with an anti-SALL4 antibody. The bar indicates 50  $\mu$ m (left panel). Anti-OCT4 ChIP was then performed from chromatin of ZhTc6 non-induced (ctrl) or induced (OCT4-OE transfected with a scrambled siRNA) cells or induced in the absence of SALL4 (OCT4-OE+esiSall4). *Sox17* promoter and *Sox2* enhancer were interrogated (graphs on the right). (\* significantly different from control cells, n=3 mean $\pm$  SEM, T-student test  $p \leq 0.01$ ).

## IP anti-OCT4/RAD21

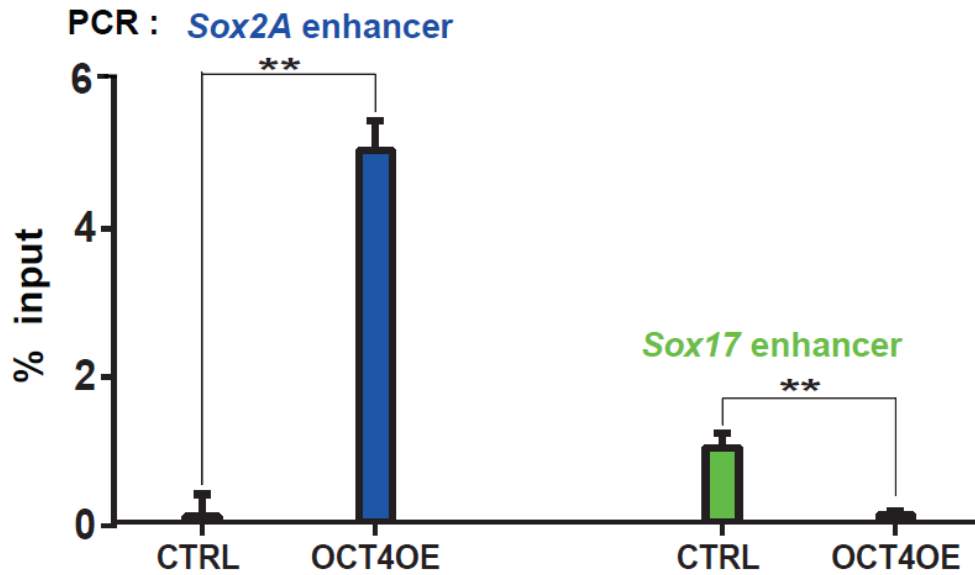

**Supplementary figure 4: OCT4 targets cohesin in HUES cells.** Sequential ChIP anti-OCT4 and then anti-RAD21 were performed from chromatin of control human ES cells (CTRL) or OCT4 overexpressing mesendodermal cells (Oct4OE). Both *Sox2A* and *Sox17* enhancers were investigated in real time PCR. (\* significantly different from control cells, n=3 mean± SEM, T-student test  $p \leq 0.01$ ).

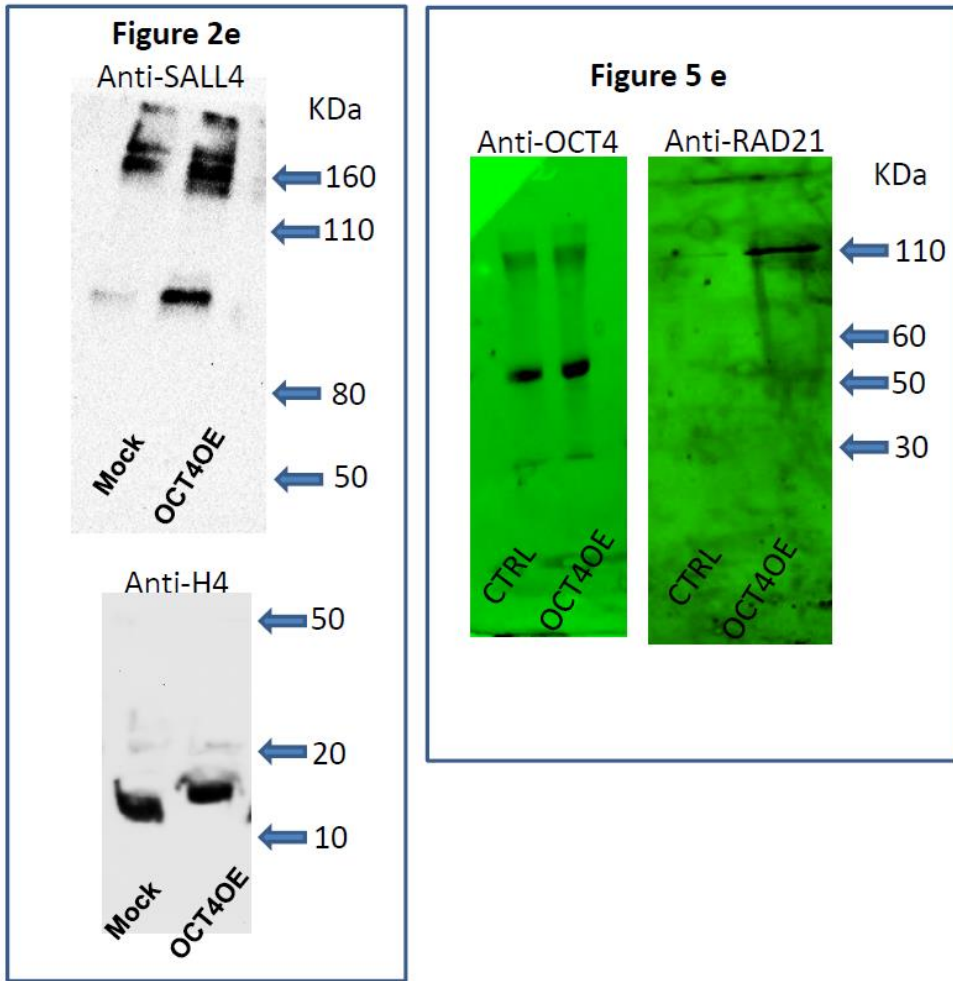

Supplementary figure 5: main western blots Figures 2e and 5e

**Supplementary table 1: Human ChIP primers, 5' to 3'**

| ChIP                                 | GENE promoters         | Sequences Forward and Reverse                                 |
|--------------------------------------|------------------------|---------------------------------------------------------------|
| Anti-OCT4                            | <i>SOX-17</i> enhancer | CCTTCCTCCTCCTGTTCCCTC<br>GGGGACTGGGTAGGAACATC                 |
| Anti-OCT4                            | <i>SOX-17</i> Region 2 | AAAGTACAGGGATGTGGGCC<br>GGGAGGTCTGTTCACTTGGT                  |
| Anti- OCT4                           | <i>SOX-2A</i> enhancer | ATTAGTCTGCTCTTCCTCGGAATGGTTGG<br>TGATGCTTGTTAAAAACGCTTCGCTCC  |
| Anti-OCT4                            | <i>SOX-2B</i> enhancer | CCTCGGGATATTATTCTGCTCAATGA<br>TAACGCTCTTTATTTAAAGTATGTGGTGGG. |
| Anti-modified histones               | <i>SOX-2</i> promoter  | CACCCACCCCTTTGTAGTCA<br>TCCCATTGTCCCGACGTA                    |
| Anti-SALL4<br>Anti-modified histones | <i>SOX-17</i> promoter | CCCTGGGTACGCTGTAGACC<br>GTCTGGCTCTGGTCGTC                     |

**Supplementary table 2 : Mouse ChIP, numbered 3 C primers 5'to 3', and FISH primers**

|                                     |                                                            |
|-------------------------------------|------------------------------------------------------------|
| <b>DpnIIS1F</b><br><b>DpnIIS1R</b>  | <b>CTTAGCTCTGCGTTGTGCAG</b><br><b>CATGATTCCATCGCAAACAC</b> |
| <b>DpnIIS2F</b><br><b>DpnIIS2R</b>  | <b>TACACGCTACGGATTTGCTG</b><br><b>CCAAGACTAGTCCCCCTTCC</b> |
| <b>DpnIIS3F</b><br><b>DpnIIS3R</b>  | <b>TGAAATATGGCCCACTCACA</b><br><b>CTCGGGGATGTAAAGGTGAA</b> |
| <b>1 Sox-2C 3'enhancer F</b>        | <b>TTTTCGTTTTTAGGGTAAGGTACTGGGAAG</b>                      |
| <i>Sox-2C</i> 3'enhancer R          | CCACGTGAATAATCCTATATGCATCACAAT                             |
| <i>SOX-17</i> 3'- Region2 F         | AAGTTGCGTCACTCCTGAGC                                       |
| <i>SOX-17</i> 3'- Region2 R         | TGGAGATCTGACTGTCCCAG                                       |
| <b>2 Sox-17 Promoter F</b>          | <b>CTTAGCTCTGCGTTGTGCAG</b>                                |
| <i>Sox-17</i> Promoter R            | CTCGGGGATGTAAAGGTGAA                                       |
| <b>3 Exon5 SOX-17</b>               | <b>CTCAAGTGTTCAAGTGGG</b>                                  |
| <b>4 Sox-17 3'enhancer R</b>        | <b>GGCTTCCTTGGAGAAAGGCAAT</b>                              |
| <b>5 Sox17 10 Kb R</b>              | <b>CTGAGCACCAGCTAATAGAGA</b>                               |
| <b>6 Sox-17 3'enhancer F</b>        | <b>ACTTTCACAGTCCAGG</b>                                    |
| <b>7 Sox-17 10 kb-F</b>             | <b>TCTCTATTAGCTGGTGCTCAG</b>                               |
| <b>8 Sox-17 20 kb-F</b>             | <b>GGAGATGCACACAAGTTACTG</b>                               |
| <b>9 Sox-17 40 kb-F</b>             | <b>AGCAAAGCTCAGACCTCATATG</b>                              |
| <b>10 Sox-17 60 kb-F</b>            | <b>AATAAGTATACAGGCCTT</b>                                  |
| <b>11 Sox-17 110kb -F</b>           | <b>TGCCTTTAATCCCAGCACT</b>                                 |
| <i>Sox-2</i> -Promoter F            | CCCATTTATTCCCTGACAGC                                       |
| <b>12 Sox-2-Promoter R</b>          | <b>GGGCTCCAAACTTCTCTCCT</b>                                |
| <b>13 Sox-2c enhancer R</b>         | <b>CCACGTGAATAATCCTATATGCATCACAAT</b>                      |
| <b>14 Sox2-3' 10 kb</b>             | <b>AGGGGCAGAAGTAACAGAA</b>                                 |
| <b>15 Sox2-3' 20 kb</b>             | <b>AAACTCCCCAAAGCTGCCTC</b>                                |
| <b>16 Sox2-5' 10kb</b>              | <b>CTGGGTGACAACTGCCGGTA</b>                                |
| <i>Sox-2B</i> 5'enhancer -F         | CCCTGTTCCAAGTCTCTTTCTGCTAGTCA                              |
| <b>17 Sox-2B 5'enhancer -<br/>R</b> | <b>CACCGATTTCAATCCAACACCATCATAG</b>                        |

|                                                                          |                                                                                         |
|--------------------------------------------------------------------------|-----------------------------------------------------------------------------------------|
| <i>Sox-2A</i> 5'enhancer -F                                              | ATTAGTCTGCTCTTCCTCGGAATGGTTGG                                                           |
| <b>18 <i>Sox-2A</i> 5'enhancer -<br/>R<br/>3C-GAPDH-F<br/>3C-GAPDH-R</b> | <b>TGATGCTTGTTAAAAACGCTTCGCTCCT<br/>AAGACAGAATGGAAGAAATGTGC<br/>GAGCCAAAAGGGTCATCAT</b> |
| <i>Sox2</i> FISH-F                                                       | AGAGCGGCTTGCAAAATTCCCT                                                                  |
| <i>Sox2</i> FISH-R                                                       | TGAAATGGGTAGCGCTGCAGTT                                                                  |
| <i>Sox17</i> FISH-F                                                      | CTAAAATACGTGCCTCAGAGTCTGCC                                                              |
| <i>Sox17</i> FISH-R                                                      | AGTGCTGTCAGGAGTGGCAAGT                                                                  |
